# Supplementary material for: Dehydrogenative coupling of methane over Pt/Al2O3 catalysts: effect of hydrogen co-feeding
Source: Royal Society of Chemistry journal article supplement (doi:10.1039/d3cy00612c), 2023-01-01
Supplement: d3cy00612c1.pdf [file d3cy00612c1.pdf]

## *Electronic Supplementary Information*

### Dehydrogenative Coupling of Methane over Pt/Al<sub>2</sub>O<sub>3</sub>

#### Catalysts: Effect of Hydrogen Co-feeding

Tatsuki Tomono,<sup>a</sup> Riku Takamura,<sup>a</sup> Miru Yoshida-Hirahara,<sup>a</sup> Tomokazu Yamamoto,<sup>b</sup> Syo Matsumura,<sup>b, c</sup> Hideki Kurokawa<sup>a</sup> and Hitoshi Ogihara<sup>\*a</sup>

<sup>a</sup> Graduate School of Science and Engineering, Saitama University, 255 Shimo-Okubo, Sakura-ku, Saitama 338-8570, Japan.

E-mail: ogihara@mail.saitama-u.ac.jp

<sup>b</sup> The Ultramicroscopy Research Center, Kyushu University, 744 Motoooka, Nishi-ku, Fukuoka 819-0395, Japan.

<sup>c</sup> National Institute of Technology, Kurume College, 1-1-1 Komorino, Kurume 830-8555, Japan

## Experimental Section

CH<sub>4</sub> conversion was calculated based on Eq. (S1).

$$\begin{aligned} CH_4 \text{ conversion} / \% &= \frac{r(\text{converted } CH_4)}{r(CH_{4 \text{ in}})} \times 100 \\ &= \frac{(r(C_2H_6) \times 2 + r(C_2H_4) \times 2 + r(C_3H_8) \times 3 \\ &\quad + r(C_3H_6) \times 3 + r(C_6H_6) \times 6 + r(C_7H_8) \times 7 + r(\text{coke}))}{CH_{4 \text{ in}}} \times 100 \dots (S1) \end{aligned}$$

The formation rate of coke was estimated based on Eq. (S2)

$$r(\text{coke}) / \mu\text{mol min}^{-1} g_{\text{cat}}^{-1} = \frac{(r(H_2) - r(C_2H_6) - r(C_2H_4) \times 2 - r(C_3H_8) \times 2 \\ - r(C_3H_6) \times 3 - r(C_6H_6) \times 9 - r(C_7H_8) \times 10)}{2} \dots (S2)$$

The selectivity of the products was calculated on a carbon basis. For example, the equation for the selectivity of ethane is shown below.

$$\text{Selectivity} / \% = \frac{2 \times r(C_2H_6)}{(r(C_2H_6) \times 2 + r(C_2H_4) \times 2 + r(C_3H_8) \times 3 \\ + r(C_3H_6) \times 3 + r(C_6H_6) \times 6 + r(C_7H_8) \times 7 + r(\text{coke}))} \times 100 \dots (S3)$$

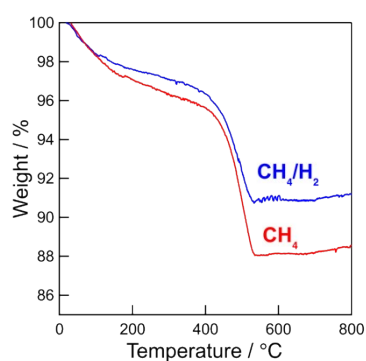

**Fig. S1** TG profiles of spent Pt(1)/Al<sub>2</sub>O<sub>3</sub> catalysts. T: 600 °C, flow rate: 20 (CH<sub>4</sub>) and 20+1 (CH<sub>4</sub>+H<sub>2</sub>) mL min<sup>-1</sup>, and catalyst mass: 0.10 g.

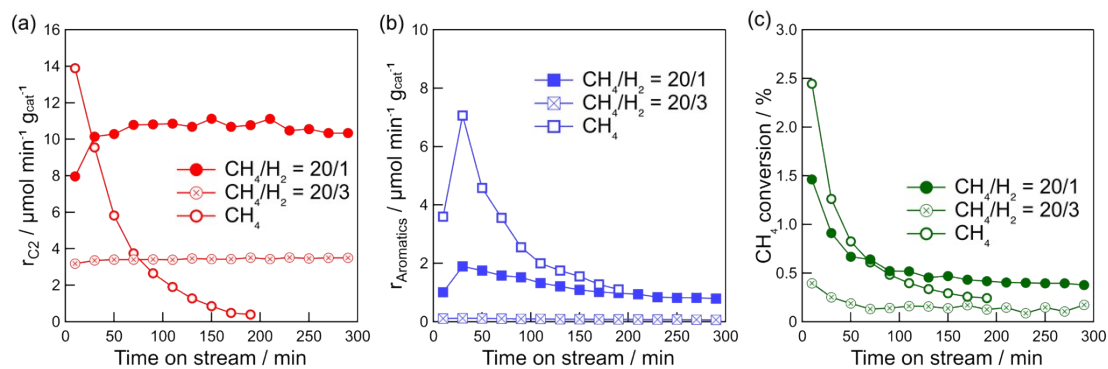

**Fig. S2** Time course of formation rate of (a) C<sub>2</sub> hydrocarbons and (b) aromatics, and (c) methane conversion for DCM reaction. Catalyst: Pt(1)/Al<sub>2</sub>O<sub>3</sub>, T: 600 °C, flow rate: 20 (CH<sub>4</sub>), 20+1 (CH<sub>4</sub>+H<sub>2</sub>), and 20+3 (CH<sub>4</sub>+H<sub>2</sub>) mL min<sup>-1</sup>, and catalyst mass: 0.10 g.

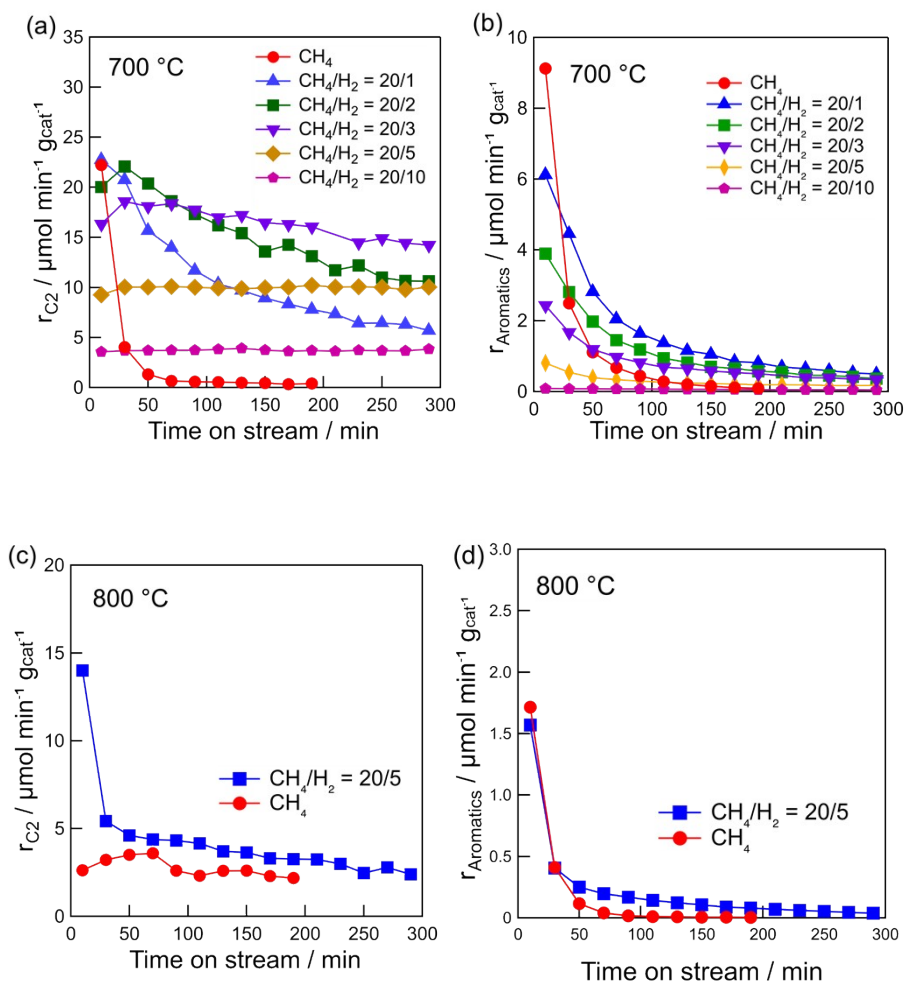

**Fig. S3** Time course of formation rate of C2 hydrocarbons and aromatics for DCM reaction. Catalyst: Pt(1)/Al<sub>2</sub>O<sub>3</sub>, T: 700 (a, b) or 800 (c, d) °C, flow rate: 20 (CH<sub>4</sub>) and 20+X (CH<sub>4</sub>+H<sub>2</sub>) mL min<sup>-1</sup>, and catalyst mass: 0.10 g.

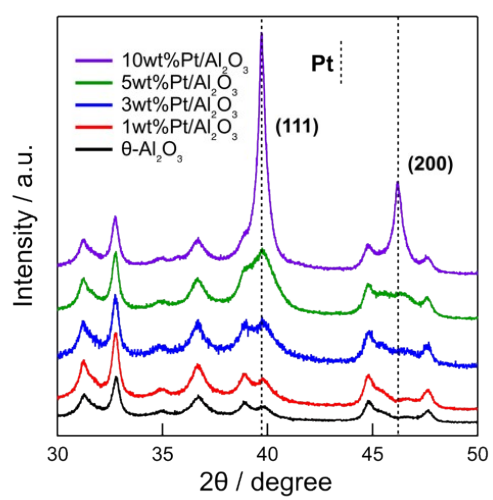

**Fig. S4** XRD patterns of Pt(1, 3, 5, and 10)/ $\text{Al}_2\text{O}_3$  and  $\theta$ - $\text{Al}_2\text{O}_3$ .

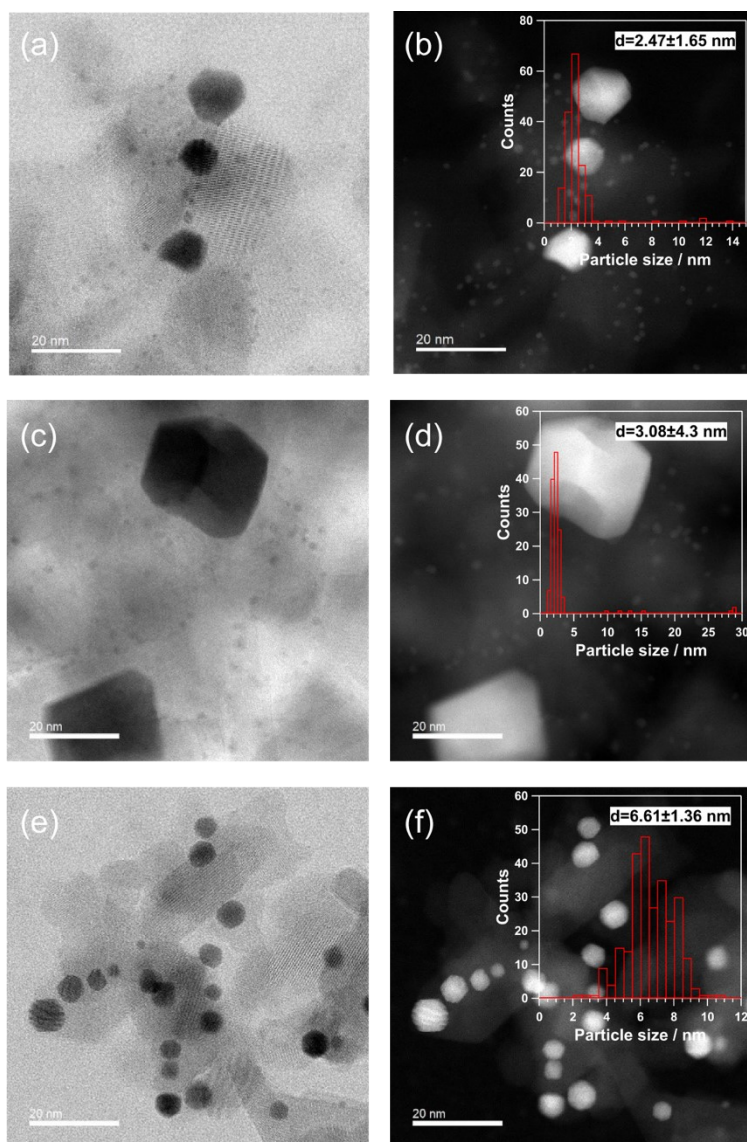

**Fig. S5** BF- and HAADF-STEM images and particle size distribution of fresh (a, b) Pt(3)/Al<sub>2</sub>O<sub>3</sub>, (c, d) Pt(5)/Al<sub>2</sub>O<sub>3</sub>, and (e, f) Pt(10)/Al<sub>2</sub>O<sub>3</sub>.

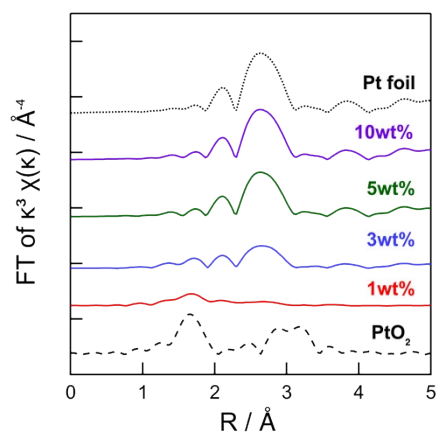

**Fig. S6** Pt L<sub>3</sub>-edge Fourier transforms (FT) of  $k^3$ -weighted EXAFS oscillations.

**Table S1** EXAFS fitting results for Pt(X)/Al<sub>2</sub>O<sub>3</sub> catalysts

| sample                                 | path  | R / Å       | CN         | $\sigma^2$ / Å | $\Delta E_0$ / eV | R-factor |
|----------------------------------------|-------|-------------|------------|----------------|-------------------|----------|
| 1wt%Pt/Al <sub>2</sub> O <sub>3</sub>  | Pt-Pt | 2.73±0.01   | 4.22±0.83  | 0.012±0.001    | 10±2              | 0.0014   |
|                                        | Pt-O  | 2.00±0.01   | 2.69±0.35  | 0.007±0.001    | 13±2              |          |
| 3wt%Pt/Al <sub>2</sub> O <sub>3</sub>  | Pt-Pt | 2.77±0.003  | 5.62±0.44  | 0.006±0.0003   | 10±1              | 0.0044   |
|                                        | Pt-O  | 2.02±0.02   | 1.42±0.38  | 0.005±0.002    | 13±3              |          |
| 5wt%Pt/Al <sub>2</sub> O <sub>3</sub>  | Pt-Pt | 2.76±0.001  | 9.63±0.30  | 0.005±0.0001   | 8±0.4             | 0.0007   |
|                                        | Pt-O  | 2.01±0.05   | 0.19±0.15  | -0.0005±0.004  | 13±12             |          |
| 10wt%Pt/Al <sub>2</sub> O <sub>3</sub> | Pt-Pt | 2.77±0.0009 | 10.22±0.25 | 0.005±0.0001   | 9±0.3             | 0.0007   |

The range in  $k$  was 3.0–14.0 Å<sup>-1</sup>, and the fit range in distance  $r$  was 1.0–3.1 Å. Notation: R, scattering path length between the absorber and the scattering atom; CN, coordination number;  $\sigma^2$ , mean square relative displacement;  $\Delta E_0$ , inner potential correction.

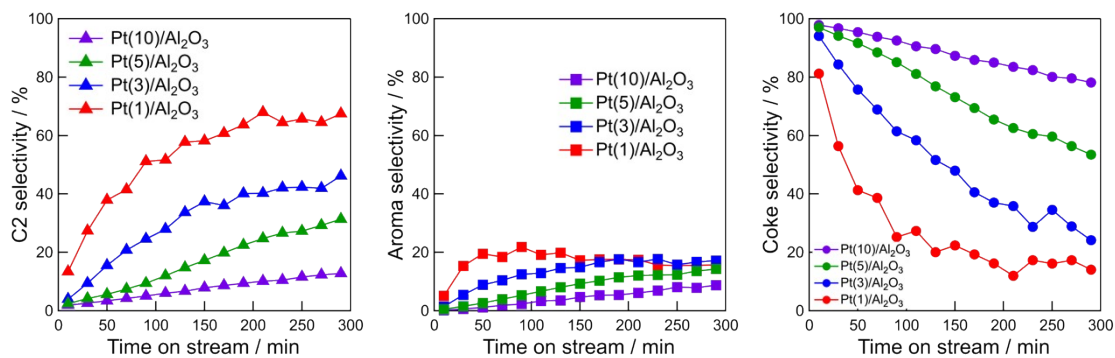

**Fig. S7** Time course of selectivity of (a) C<sub>2</sub> hydrocarbons, (b) aromatics, and (c) coke for DCM reaction. Catalyst: Pt(1, 3, 5, and 10)/Al<sub>2</sub>O<sub>3</sub>, T: 600 °C, flow rate: 20+1 (CH<sub>4</sub>+H<sub>2</sub>) mL min<sup>-1</sup>, and catalyst mass: 0.10 g.

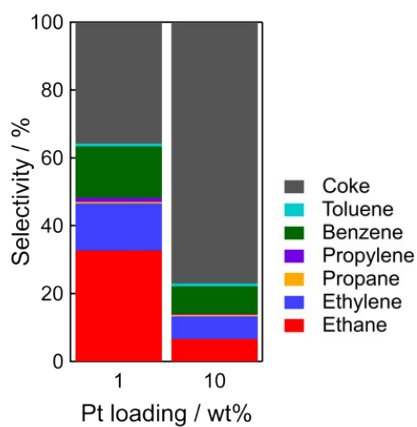

**Fig. S8** Product selectivity for DCM reaction Catalyst: Pt(1 and 10)/Al<sub>2</sub>O<sub>3</sub>, T: 600 °C, flow rate: 20+1 (CH<sub>4</sub>+H<sub>2</sub>) mL min<sup>-1</sup>, and catalyst mass: 0.10 g (for Pt(1)/Al<sub>2</sub>O<sub>3</sub>) and 0.694 g (for Pt(10)/Al<sub>2</sub>O<sub>3</sub>).



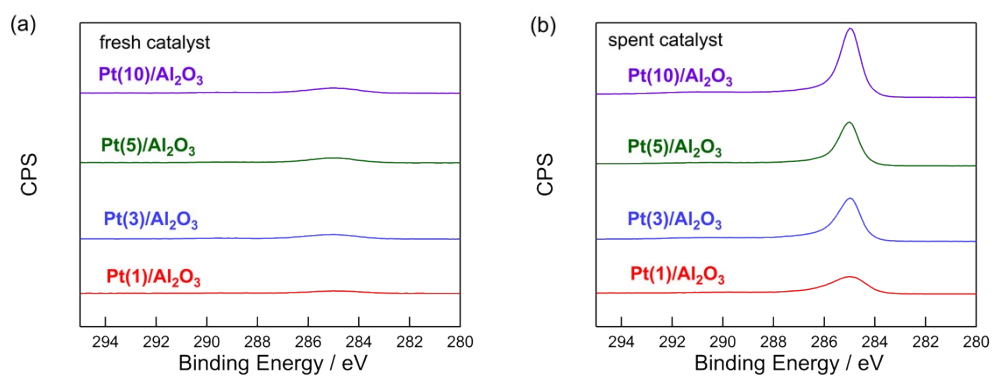

**Fig. S9** C 1s XPS of (a) fresh and (b) spent Pt(1, 3, 5, and 10)/Al<sub>2</sub>O<sub>3</sub> catalysts. DCM conditions: T = 600 °C, flow rate = 20+1 (CH<sub>4</sub>+H<sub>2</sub>) mL min<sup>-1</sup>, and catalyst mass = 0.10 g.
